## **Temporal Variations in the Intensity of Care Provided to Community and Nursing Home Residents Who Died of COVID-19 in Ontario, Canada**

Kevin A. Brown, PhD, Nick Daneman, MD, MSc, Sarah A. Buchan, PhD, Adrienne K. Chan, MD, MPH, Nathan M. Stall, MD

### **Author affiliations**

Public Health Ontario, Toronto, Canada (Brown, Buchan)

Department of Medicine, University of Toronto, Canada (Chan, Daneman, Stall)

**Version date:** November 4, 2020

### **Introduction**

Worldwide, nursing home residents have experienced disproportionately high COVID-19 mortality due to the intersection of congregate living, multimorbidity, and advanced age.<sup>1</sup> Among 12 OECD countries, Canada has had the highest proportion of COVID-19 deaths in nursing home residents (78%), raising concerns about a skewed pandemic response that averted much transmission and mortality in community-dwelling residents, but did not adequately protect those in nursing homes.<sup>2</sup> In Canada's most populous province of Ontario there was no official policy denying hospitalizations for nursing home residents with COVID-19, yet media reports and a provincial commission suggest that resident transfers to hospital were strongly discouraged at the onset of the pandemic.<sup>3,4</sup> To investigate this, we measured temporal variations in hospitalizations among community and nursing home-dwelling decedents with COVID-19 during the first and second waves of the pandemic.

### **Methods**

We conducted a population-based cohort study of residents of Ontario, Canada with COVID-19 who died between March 11, 2020 (first COVID-19 death in Ontario) and October 28, 2020. Data were extracted on the last day of the study period from the provincial reportable disease surveillance system, which records all reported COVID-19 cases, and their outcomes. All Ontario residents receive medically necessary services under a publicly funded provincial health insurance program, and nursing home residents receive additional personal and nursing care. We examined hospitalization prior to death as a function of 4 factors: community (defined as all non-nursing home residents) vs. nursing home residence, age in years (<70, 70-79, 80-89, ≥90), gender, and month of death (1<sup>st</sup> wave: March-April [peak], May, June-July 2020 [nadir], 2<sup>nd</sup> wave: August-October 2020). The study received a waiver of consent from the research ethics board of Public Health Ontario.

### **Results**

A total of 3,114 people with confirmed COVID-19 died in Ontario from March to October, 2020 (Table), of whom 1,354 (43.5%) were hospitalized prior to death (median: 9 days before death, interquartile

range: 4-19). Among nursing home decedents (N=2000), 22.4% were admitted to hospital prior to death, but this varied substantially from a low of 15.5% in March-April (peak of wave 1) to a high of 41.2% in June-July (nadir of wave 1). Among community-dwelling decedents (N=1,114), admission to acute care was higher (81.4%) and remained relatively stable throughout the first and second waves. Similar temporal trends for nursing home versus community decedents were apparent in age-stratified analyses (Figure). Women who died were less likely to have been hospitalized compared to men in both community (80% women vs 84% men) and nursing home (21% women vs 24% men) settings.

## Discussion

Only a minority of Ontario nursing home residents who died of COVID-19 were hospitalized prior to death, and that there were substantial temporal variations, with hospitalizations reaching their lowest point when overall COVID-19 incidence peaked in mid-April, 2020. While many nursing home residents had pre-pandemic advance directives precluding hospitalization, the low admission rate observed in March-April 2020 (15.5%) was inconsistent with both higher admission rates in subsequent months (>30%), and comparatively stable rates among community-dwelling adults. This raises concerns for other jurisdictions, including the United States, which has seen substantial inter-state variations in the proportion of COVID-19 deaths occurring in nursing homes, ranging from 18% in Nevada to 79% in New Hampshire.<sup>5</sup>

This analysis has limitations. Hospitalizations recorded in the surveillance system may undercount hospitalizations compared to administrative records (sensitivity=0.87, specificity=0.98).<sup>6</sup> We also lacked information on advance directives which may have impacted the decision to hospitalize.

Our findings substantiate reports suggesting that hospitalizations for nursing home residents with COVID-19 were low during the peak of the pandemic's first wave in Canada, which may have contributed to the particularly high concentration of COVID-19 mortality in Ontario's nursing homes.

## References

1. Ouslander JG, Grabowski DC. COVID-19 in Nursing Homes: Calming the Perfect Storm. *J Am Geriatr Soc*. 2020;68(10):2153-2162. doi:10.1111/jgs.16784
2. Sepulveda ER, Stall NM, Sinha SK. A Comparison of COVID-19 Mortality Rates among Long-Term Care Residents in 12 OECD Countries. *Journal of the American Medical Directors Association*. Published online September 2020:S152586102030791X. doi:10.1016/j.jamda.2020.08.039
3. Reith T. As COVID-19 rips through nursing homes, some tell loved ones there's "no benefit" to sending ill to hospital | CBC News. CBC. Published April 3, 2020. Accessed October 28, 2020. <https://www.cbc.ca/news/health/covid-19-long-term-care-1.5519657>
4. Ontario Long Term Care Commission. *Meeting with Chartwell Retirement Residences*; 2020:93. [http://www.ltccommission-commissionsld.ca/transcripts/pdf/Chartwell\\_Retirement\\_Residences\\_Transcript\\_October\\_09\\_2020.pdf](http://www.ltccommission-commissionsld.ca/transcripts/pdf/Chartwell_Retirement_Residences_Transcript_October_09_2020.pdf)

5. About 38% of U.S. Coronavirus Deaths Are Linked to Nursing Homes. *The New York Times*. <https://www.nytimes.com/interactive/2020/us/coronavirus-nursing-homes.html>. Published June 27, 2020. Accessed October 29, 2020.
6. Chung H. Validation of COVID-19 Outcomes in Public Health Surveillance Data using Health Administrative Databases. Personal e-mail communication. October 21, 2020.

## Tables and Figures

Table. Admissions to hospital prior to death among community and nursing home residents who died with COVID-19, March to October 2020 (N=3,114).

|                | Community Residents |                                     |          | Nursing Home Residents |                                     |          |
|----------------|---------------------|-------------------------------------|----------|------------------------|-------------------------------------|----------|
|                | N                   | Hospitalized prior to death (N [%]) | p-value* | N                      | Hospitalized prior to death (N [%]) | p-value* |
| Total          | 1,114               | 907 (81.4)                          |          | 2,000                  | 447 (22.4)                          |          |
| Month          |                     |                                     |          |                        |                                     |          |
| March-April    | 532                 | 426 (80.1)                          |          | 1,028                  | 159 (15.5)                          |          |
| May            | 306                 | 253 (82.7)                          | <0.001   | 729                    | 196 (26.9)                          | <0.001   |
| June-July      | 143                 | 127 (88.8)                          |          | 165                    | 68 (41.2)                           |          |
| August-October | 133                 | 101 (75.9)                          |          | 78                     | 24 (30.8)                           |          |
| Age (years)    |                     |                                     |          |                        |                                     |          |
| <70            | 287                 | 239 (83.3)                          |          | 141                    | 56 (39.7)                           |          |
| 70-79          | 250                 | 217 (86.8)                          | <0.001   | 299                    | 82 (27.4)                           | <0.001   |
| 80-89          | 352                 | 291 (82.7)                          |          | 778                    | 175 (22.5)                          |          |
| ≥90            | 225                 | 160 (71.1)                          |          | 782                    | 134 (17.1)                          |          |
| Gender*        |                     |                                     |          |                        |                                     |          |
| Male           | 621                 | 517 (83.3)                          | 0.1      | 811                    | 202 (24.9)                          | 0.03     |
| Female         | 491                 | 390 (79.4)                          |          | 1,163                  | 242 (20.8)                          |          |

\* P-values for differences in proportions were based on Pearson's chi-squared test

\*\* Deaths with unknown gender are not presented below due to small cell counts (N=28)

Figure. Admissions to hospital prior to death among community and nursing home decedents with COVID-19, March to October 2020, (N=3,114), stratified by age group (<80, 80-89, ≥90).

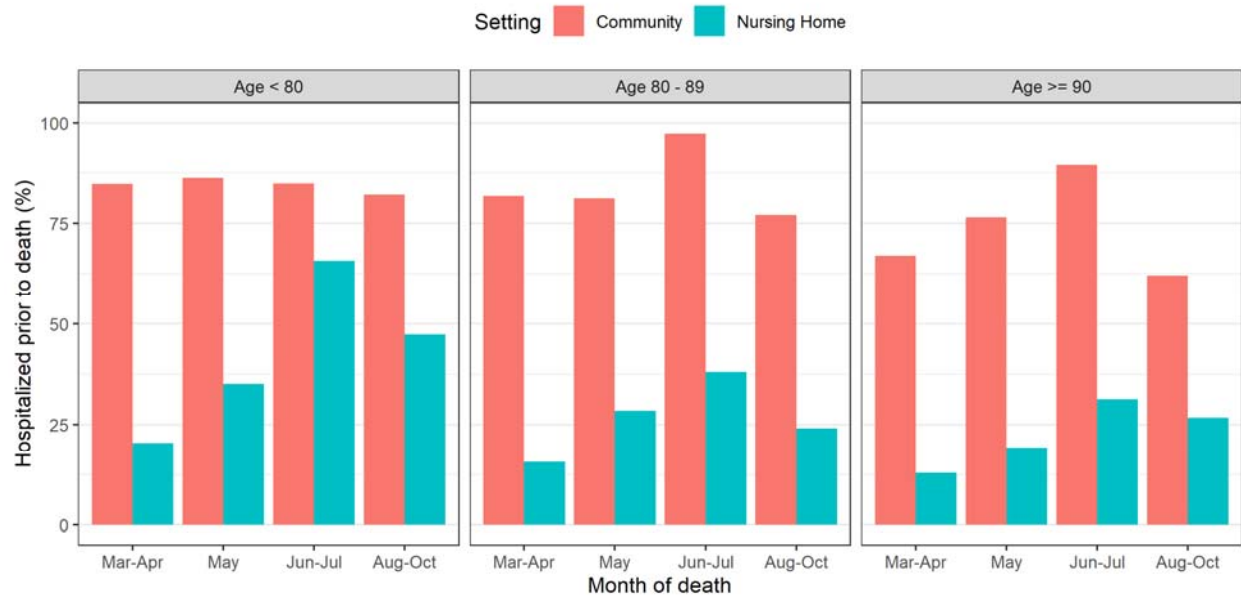

Source: https://medrxiv.org/content/10.1101/2020.11.06.20227140v1.full.pdf
